# Supplementary material
Source: publisher figshare collection journal article supplement (https://acs.figshare.com/ndownloader/files/4346641)
Supplement: Supplementary file 1 [file 4346641]

  
data_manoj5m 
  
_audit_creation_method            SHELXL-97 
_chemical_name_systematic 
; 
 ? 
; 
_chemical_name_common             ? 
_chemical_melting_point           ? 
_chemical_formula_moiety          ? 
_chemical_formula_sum 
 'C14 H17 N5 O3 S' 
_chemical_formula_weight          335.39 
  
loop_ 
 _atom_type_symbol 
 _atom_type_description 
 _atom_type_scat_dispersion_real 
 _atom_type_scat_dispersion_imag 
 _atom_type_scat_source 
 'C'  'C'   0.0033   0.0016 
 'International Tables Vol C Tables 4.2.6.8 and 6.1.1.4' 
 'H'  'H'   0.0000   0.0000 
 'International Tables Vol C Tables 4.2.6.8 and 6.1.1.4' 
 'N'  'N'   0.0061   0.0033 
 'International Tables Vol C Tables 4.2.6.8 and 6.1.1.4' 
 'O'  'O'   0.0106   0.0060 
 'International Tables Vol C Tables 4.2.6.8 and 6.1.1.4' 
 'S'  'S'   0.1246   0.1234 
 'International Tables Vol C Tables 4.2.6.8 and 6.1.1.4' 
  
_symmetry_cell_setting            Monoclinic 
_symmetry_space_group_name_H-M    P2(1)/n 
  
loop_ 
 _symmetry_equiv_pos_as_xyz 
 'x, y, z' 
 '-x+1/2, y+1/2, -z+1/2' 
 '-x, -y, -z' 
 'x-1/2, -y-1/2, z-1/2' 
  
_cell_length_a                    14.707(3) 
_cell_length_b                    5.2984(11) 
_cell_length_c                    19.177(4) 
_cell_angle_alpha                 90.00 
_cell_angle_beta                  93.359(4) 
_cell_angle_gamma                 90.00 
_cell_volume                      1491.8(5) 
_cell_formula_units_Z             4 
_cell_measurement_temperature     100(2) 
_cell_measurement_reflns_used     3582 
_cell_measurement_theta_min       2.77 
_cell_measurement_theta_max       28.14 
  
_exptl_crystal_description        needle 
_exptl_crystal_colour             yellow 
_exptl_crystal_size_max           0.60 
_exptl_crystal_size_mid           0.12 
_exptl_crystal_size_min           0.05 
_exptl_crystal_density_meas       ? 
_exptl_crystal_density_diffrn     1.493 
_exptl_crystal_density_method     'not measured' 
_exptl_crystal_F_000              704 
_exptl_absorpt_coefficient_mu     0.241 
_exptl_absorpt_correction_type    multi-scan 
_exptl_absorpt_correction_T_min   0.371 
_exptl_absorpt_correction_T_max   0.745 
_exptl_absorpt_process_details    ? 
  
_exptl_special_details 
; 
 ? 
; 
  
_diffrn_ambient_temperature       100(2) 
_diffrn_radiation_wavelength      0.71073 
_diffrn_radiation_type            MoK\a 
_diffrn_radiation_source          'fine-focus sealed tube' 
_diffrn_radiation_monochromator   graphite 
_diffrn_measurement_device_type   'CCD area detector' 
_diffrn_measurement_method        'phi and omega scans' 
_diffrn_detector_area_resol_mean  ? 
_diffrn_standards_number          ? 
_diffrn_standards_interval_count  ? 
_diffrn_standards_interval_time   ? 
_diffrn_standards_decay_%         ? 
_diffrn_reflns_number             9078 
_diffrn_reflns_av_R_equivalents   0.0584 
_diffrn_reflns_av_sigmaI/netI     0.0697 
_diffrn_reflns_limit_h_min        -19 
_diffrn_reflns_limit_h_max        9 
_diffrn_reflns_limit_k_min        -7 
_diffrn_reflns_limit_k_max        7 
_diffrn_reflns_limit_l_min        -24 
_diffrn_reflns_limit_l_max        25 
_diffrn_reflns_theta_min          1.70 
_diffrn_reflns_theta_max          28.29 
_reflns_number_total              3562 
_reflns_number_gt                 2978 
_reflns_threshold_expression      >2sigma(I) 
  
_computing_data_collection        'Bruker SMART' 
_computing_cell_refinement        'Bruker SMART' 
_computing_data_reduction         'Bruker SAINT' 
_computing_structure_solution     'SHELXS-97 (Sheldrick, 1990)' 
_computing_structure_refinement   'SHELXL-97 (Sheldrick, 1997)' 
_computing_molecular_graphics     'Bruker SHELXTL' 
_computing_publication_material   'Bruker SHELXTL' 
  
_refine_special_details 
; 
 Refinement of F^2^ against ALL reflections.  The weighted R-factor wR and 
 goodness of fit S are based on F^2^, conventional R-factors R are based 
 on F, with F set to zero for negative F^2^. The threshold expression of 
 F^2^ > 2sigma(F^2^) is used only for calculating R-factors(gt) etc. and is 
 not relevant to the choice of reflections for refinement.  R-factors based 
 on F^2^ are statistically about twice as large as those based on F, and R- 
 factors based on ALL data will be even larger. 
; 
  
_refine_ls_structure_factor_coef  Fsqd 
_refine_ls_matrix_type            full 
_refine_ls_weighting_scheme       calc 
_refine_ls_weighting_details 
 'calc w=1/[\s^2^(Fo^2^)+(0.1250P)^2^+0.2680P] where P=(Fo^2^+2Fc^2^)/3' 
_atom_sites_solution_primary      direct 
_atom_sites_solution_secondary    difmap 
_atom_sites_solution_hydrogens    geom 
_refine_ls_hydrogen_treatment     mixed 
_refine_ls_extinction_method      none 
_refine_ls_extinction_coef        ? 
_refine_ls_number_reflns          3562 
_refine_ls_number_parameters      215 
_refine_ls_number_restraints      0 
_refine_ls_R_factor_all           0.0752 
_refine_ls_R_factor_gt            0.0665 
_refine_ls_wR_factor_ref          0.1838 
_refine_ls_wR_factor_gt           0.1718 
_refine_ls_goodness_of_fit_ref    1.050 
_refine_ls_restrained_S_all       1.050 
_refine_ls_shift/su_max           0.004 
_refine_ls_shift/su_mean          0.001 
  
loop_ 
 _atom_site_label 
 _atom_site_type_symbol 
 _atom_site_fract_x 
 _atom_site_fract_y 
 _atom_site_fract_z 
 _atom_site_U_iso_or_equiv 
 _atom_site_adp_type 
 _atom_site_occupancy 
 _atom_site_symmetry_multiplicity 
 _atom_site_calc_flag 
 _atom_site_refinement_flags 
 _atom_site_disorder_assembly 
 _atom_site_disorder_group 
S1 S 0.69506(3) 1.40218(9) 0.61756(2) 0.0162(2) Uani 1 1 d . . . 
O1 O 0.66070(10) 1.5701(3) 0.56438(8) 0.0205(4) Uani 1 1 d . . . 
O2 O 0.71978(11) 1.4875(3) 0.68643(7) 0.0236(4) Uani 1 1 d . . . 
O3 O 0.41138(11) 0.7551(3) 0.97222(7) 0.0239(4) Uani 1 1 d . . . 
N1 N 0.77933(12) 1.2512(3) 0.58864(9) 0.0194(4) Uani 1 1 d . . . 
N2 N 0.61026(12) 1.1923(3) 0.62851(8) 0.0176(4) Uani 1 1 d . . . 
N3 N 0.49202(12) 0.9417(3) 0.60495(9) 0.0192(4) Uani 1 1 d . . . 
N5 N 0.50075(12) 1.0141(4) 0.90742(9) 0.0195(4) Uani 1 1 d . . . 
H5 H 0.5213 1.1125 0.9418 0.023 Uiso 1 1 calc R . . 
N6 N 0.39075(13) 0.5187(4) 0.63613(9) 0.0207(4) Uani 1 1 d . . . 
H6N H 0.4110(19) 0.613(5) 0.6088(14) 0.022(7) Uiso 1 1 d . . . 
C1 C 0.77568(18) 1.1879(5) 0.51370(12) 0.0311(6) Uani 1 1 d . . . 
H1A H 0.8329 1.1068 0.5024 0.047 Uiso 1 1 calc R . . 
H1B H 0.7670 1.3426 0.4861 0.047 Uiso 1 1 calc R . . 
H1C H 0.7248 1.0724 0.5028 0.047 Uiso 1 1 calc R . . 
C2 C 0.82215(17) 1.0567(4) 0.63483(14) 0.0292(5) Uani 1 1 d . . . 
H2A H 0.7886 0.8976 0.6286 0.044 Uiso 1 1 calc R . . 
H2B H 0.8208 1.1116 0.6836 0.044 Uiso 1 1 calc R . . 
H2C H 0.8854 1.0316 0.6230 0.044 Uiso 1 1 calc R . . 
C3 C 0.54867(14) 1.1008(4) 0.57843(11) 0.0191(4) Uani 1 1 d . . . 
H3 H 0.5473 1.1470 0.5305 0.023 Uiso 1 1 calc R . . 
C4 C 0.59019(14) 1.0815(4) 0.69112(11) 0.0185(4) Uani 1 1 d . . . 
H4A H 0.6214 1.1059 0.7354 0.022 Uiso 1 1 calc R . . 
C5 C 0.51624(14) 0.9294(4) 0.67641(10) 0.0155(4) Uani 1 1 d . . . 
C6 C 0.46377(13) 0.7854(4) 0.72618(10) 0.0149(4) Uani 1 1 d . . . 
C7 C 0.40145(14) 0.5881(4) 0.70493(11) 0.0165(4) Uani 1 1 d . . . 
C8 C 0.35243(13) 0.4591(4) 0.75542(11) 0.0174(4) Uani 1 1 d . . . 
H8 H 0.3120 0.3272 0.7406 0.021 Uiso 1 1 calc R . . 
C9 C 0.36175(13) 0.5195(4) 0.82566(11) 0.0179(4) Uani 1 1 d . . . 
H9 H 0.3285 0.4311 0.8590 0.021 Uiso 1 1 calc R . . 
C10 C 0.42111(13) 0.7131(4) 0.84603(10) 0.0156(4) Uani 1 1 d . . . 
C11 C 0.44195(13) 0.8222(4) 0.91599(10) 0.0176(4) Uani 1 1 d . . . 
C12 C 0.52683(13) 1.0422(4) 0.83597(10) 0.0157(4) Uani 1 1 d . . . 
H12A H 0.5928 1.0116 0.8325 0.019 Uiso 1 1 calc R . . 
H12B H 0.5116 1.2128 0.8177 0.019 Uiso 1 1 calc R . . 
C13 C 0.47099(13) 0.8430(4) 0.79738(10) 0.0152(4) Uani 1 1 d . . . 
C14 C 0.32378(15) 0.3352(4) 0.61131(11) 0.0217(5) Uani 1 1 d . . . 
H14A H 0.3353 0.1744 0.6355 0.033 Uiso 1 1 calc R . . 
H14B H 0.3279 0.3108 0.5609 0.033 Uiso 1 1 calc R . . 
H14C H 0.2627 0.3958 0.6207 0.033 Uiso 1 1 calc R . . 
  
loop_ 
 _atom_site_aniso_label 
 _atom_site_aniso_U_11 
 _atom_site_aniso_U_22 
 _atom_site_aniso_U_33 
 _atom_site_aniso_U_23 
 _atom_site_aniso_U_13 
 _atom_site_aniso_U_12 
S1 0.0128(3) 0.0199(3) 0.0166(3) -0.00004(17) 0.0063(2) -0.00330(17) 
O1 0.0171(8) 0.0233(8) 0.0219(8) 0.0025(6) 0.0076(6) 0.0014(6) 
O2 0.0214(8) 0.0305(8) 0.0193(8) -0.0033(6) 0.0049(6) -0.0101(6) 
O3 0.0212(8) 0.0349(9) 0.0168(7) -0.0001(6) 0.0101(6) -0.0081(7) 
N1 0.0133(9) 0.0216(9) 0.0240(9) 0.0015(7) 0.0074(7) 0.0018(7) 
N2 0.0130(8) 0.0250(9) 0.0152(8) 0.0003(6) 0.0045(6) -0.0048(7) 
N3 0.0141(9) 0.0253(9) 0.0188(9) 0.0006(7) 0.0046(7) -0.0035(7) 
N5 0.0159(9) 0.0279(10) 0.0155(8) -0.0037(7) 0.0084(7) -0.0065(7) 
N6 0.0187(9) 0.0273(10) 0.0167(9) -0.0004(7) 0.0059(7) -0.0094(8) 
C1 0.0288(13) 0.0381(13) 0.0275(12) -0.0080(10) 0.0112(9) 0.0093(10) 
C2 0.0188(12) 0.0251(11) 0.0435(14) 0.0111(10) -0.0007(10) -0.0013(9) 
C3 0.0147(10) 0.0270(11) 0.0160(10) -0.0005(7) 0.0044(8) -0.0036(8) 
C4 0.0129(10) 0.0282(11) 0.0151(9) 0.0017(8) 0.0053(7) -0.0021(8) 
C5 0.0106(9) 0.0198(9) 0.0167(9) -0.0005(7) 0.0054(7) 0.0000(7) 
C6 0.0073(9) 0.0207(9) 0.0173(9) 0.0003(7) 0.0053(7) -0.0004(7) 
C7 0.0104(10) 0.0204(10) 0.0190(10) -0.0015(7) 0.0040(7) 0.0008(7) 
C8 0.0094(10) 0.0219(9) 0.0214(10) -0.0008(8) 0.0049(8) -0.0026(7) 
C9 0.0110(10) 0.0233(10) 0.0202(10) 0.0026(8) 0.0078(7) -0.0007(8) 
C10 0.0090(9) 0.0218(10) 0.0166(9) 0.0010(7) 0.0051(7) 0.0006(7) 
C11 0.0104(9) 0.0260(10) 0.0169(9) -0.0011(8) 0.0047(7) -0.0004(8) 
C12 0.0107(9) 0.0220(9) 0.0151(9) -0.0006(7) 0.0067(7) -0.0013(7) 
C13 0.0078(9) 0.0202(9) 0.0180(9) -0.0002(7) 0.0045(7) 0.0018(7) 
C14 0.0172(11) 0.0276(11) 0.0205(10) -0.0006(8) 0.0021(8) -0.0060(8) 
  
_geom_special_details 
; 
 All esds (except the esd in the dihedral angle between two l.s. planes) 
 are estimated using the full covariance matrix.  The cell esds are taken 
 into account individually in the estimation of esds in distances, angles 
 and torsion angles; correlations between esds in cell parameters are only 
 used when they are defined by crystal symmetry.  An approximate (isotropic) 
 treatment of cell esds is used for estimating esds involving l.s. planes. 
; 
  
loop_ 
 _geom_bond_atom_site_label_1 
 _geom_bond_atom_site_label_2 
 _geom_bond_distance 
 _geom_bond_site_symmetry_2 
 _geom_bond_publ_flag 
S1 O2 1.4229(15) . ? 
S1 O1 1.4235(15) . ? 
S1 N1 1.6013(18) . ? 
S1 N2 1.6931(18) . ? 
O3 C11 1.244(3) . ? 
N1 C1 1.474(3) . ? 
N1 C2 1.476(3) . ? 
N2 C3 1.370(2) . ? 
N2 C4 1.384(3) . ? 
N3 C3 1.309(3) . ? 
N3 C5 1.397(3) . ? 
N5 C11 1.351(3) . ? 
N5 C12 1.452(3) . ? 
N5 H5 0.8800 . ? 
N6 C7 1.370(3) . ? 
N6 C14 1.445(3) . ? 
N6 H6N 0.80(3) . ? 
C1 H1A 0.9800 . ? 
C1 H1B 0.9800 . ? 
C1 H1C 0.9800 . ? 
C2 H2A 0.9800 . ? 
C2 H2B 0.9800 . ? 
C2 H2C 0.9800 . ? 
C3 H3 0.9500 . ? 
C4 C5 1.370(3) . ? 
C4 H4A 0.9500 . ? 
C5 C6 1.475(3) . ? 
C6 C13 1.397(3) . ? 
C6 C7 1.434(3) . ? 
C7 C8 1.416(3) . ? 
C8 C9 1.384(3) . ? 
C8 H8 0.9500 . ? 
C9 C10 1.388(3) . ? 
C9 H9 0.9500 . ? 
C10 C13 1.401(3) . ? 
C10 C11 1.476(3) . ? 
C12 C13 1.505(3) . ? 
C12 H12A 0.9900 . ? 
C12 H12B 0.9900 . ? 
C14 H14A 0.9800 . ? 
C14 H14B 0.9800 . ? 
C14 H14C 0.9800 . ? 
  
loop_ 
 _geom_angle_atom_site_label_1 
 _geom_angle_atom_site_label_2 
 _geom_angle_atom_site_label_3 
 _geom_angle 
 _geom_angle_site_symmetry_1 
 _geom_angle_site_symmetry_3 
 _geom_angle_publ_flag 
O2 S1 O1 121.82(10) . . ? 
O2 S1 N1 108.62(10) . . ? 
O1 S1 N1 108.28(9) . . ? 
O2 S1 N2 104.08(9) . . ? 
O1 S1 N2 105.43(9) . . ? 
N1 S1 N2 107.79(9) . . ? 
C1 N1 C2 114.61(19) . . ? 
C1 N1 S1 117.82(15) . . ? 
C2 N1 S1 116.92(16) . . ? 
C3 N2 C4 106.99(17) . . ? 
C3 N2 S1 127.38(14) . . ? 
C4 N2 S1 125.63(14) . . ? 
C3 N3 C5 106.24(17) . . ? 
C11 N5 C12 113.48(17) . . ? 
C11 N5 H5 123.3 . . ? 
C12 N5 H5 123.3 . . ? 
C7 N6 C14 122.37(19) . . ? 
C7 N6 H6N 116.0(19) . . ? 
C14 N6 H6N 118.8(19) . . ? 
N1 C1 H1A 109.5 . . ? 
N1 C1 H1B 109.5 . . ? 
H1A C1 H1B 109.5 . . ? 
N1 C1 H1C 109.5 . . ? 
H1A C1 H1C 109.5 . . ? 
H1B C1 H1C 109.5 . . ? 
N1 C2 H2A 109.5 . . ? 
N1 C2 H2B 109.5 . . ? 
H2A C2 H2B 109.5 . . ? 
N1 C2 H2C 109.5 . . ? 
H2A C2 H2C 109.5 . . ? 
H2B C2 H2C 109.5 . . ? 
N3 C3 N2 111.43(18) . . ? 
N3 C3 H3 124.3 . . ? 
N2 C3 H3 124.3 . . ? 
C5 C4 N2 106.15(18) . . ? 
C5 C4 H4A 126.9 . . ? 
N2 C4 H4A 126.9 . . ? 
C4 C5 N3 109.16(18) . . ? 
C4 C5 C6 127.62(18) . . ? 
N3 C5 C6 123.09(17) . . ? 
C13 C6 C7 116.60(18) . . ? 
C13 C6 C5 120.45(18) . . ? 
C7 C6 C5 122.92(17) . . ? 
N6 C7 C8 119.64(18) . . ? 
N6 C7 C6 120.32(19) . . ? 
C8 C7 C6 120.01(18) . . ? 
C9 C8 C7 121.90(19) . . ? 
C9 C8 H8 119.1 . . ? 
C7 C8 H8 119.1 . . ? 
C8 C9 C10 118.02(19) . . ? 
C8 C9 H9 121.0 . . ? 
C10 C9 H9 121.0 . . ? 
C9 C10 C13 121.38(19) . . ? 
C9 C10 C11 129.70(19) . . ? 
C13 C10 C11 108.90(18) . . ? 
O3 C11 N5 125.94(19) . . ? 
O3 C11 C10 127.52(19) . . ? 
N5 C11 C10 106.53(17) . . ? 
N5 C12 C13 103.01(16) . . ? 
N5 C12 H12A 111.2 . . ? 
C13 C12 H12A 111.2 . . ? 
N5 C12 H12B 111.2 . . ? 
C13 C12 H12B 111.2 . . ? 
H12A C12 H12B 109.1 . . ? 
C6 C13 C10 122.07(18) . . ? 
C6 C13 C12 129.92(18) . . ? 
C10 C13 C12 108.01(17) . . ? 
N6 C14 H14A 109.5 . . ? 
N6 C14 H14B 109.5 . . ? 
H14A C14 H14B 109.5 . . ? 
N6 C14 H14C 109.5 . . ? 
H14A C14 H14C 109.5 . . ? 
H14B C14 H14C 109.5 . . ? 
  
_diffrn_measured_fraction_theta_max    0.963 
_diffrn_reflns_theta_full              28.29 
_diffrn_measured_fraction_theta_full   0.963 
_refine_diff_density_max    0.954 
_refine_diff_density_min   -1.303 
_refine_diff_density_rms    0.131 
